# Supplementary material for: Structure and reactivity of polymer-supported carbonylation catalysts
Source: Royal Society of Chemistry journal article supplement (doi:10.1039/b200606e), 2002-01-01
Supplement: b200606e.pdf [file b200606e.pdf]

## Supplementary Information

### Structure and reactivity of polymer supported carbonylation catalysts

Anthony Haynes,<sup>\*a</sup> Peter M. Maitlis,<sup>a</sup> Ruhksana Quyoum,<sup>a</sup> Claire Pulling<sup>a</sup> Harry Adams,<sup>a</sup> Sharon E. Spey<sup>a</sup> and Richard W. Strange<sup>b</sup>

<sup>a</sup> Department of Chemistry, University of Sheffield, Brook Hill, Sheffield, S3 7HF, UK

<sup>b</sup> Synchrotron Radiation Department, Daresbury Laboratory, Daresbury, Warrington, Cheshire, WA4 4AD, UK.

#### Kinetic data

**Table S1.** Observed pseudo first order rate constants,  $k_{\text{obs}}$ , for oxidative addition of MeI to  $[\text{Rh}(\text{CO})_2\text{I}_2]^-$  with polymeric and monomeric counterions in  $\text{CH}_2\text{Cl}_2$  or neat MeI.

| Temp<br>°C | [MeI]<br>M | Cross-<br>linking<br>% | 4-VP<br>content<br>mmol g <sup>-1</sup> | Film<br>thickness<br>µm | R               | 10 <sup>4</sup> $k_{\text{obs}}$<br>s <sup>-1</sup> |                                |                   |                     |                     |
|------------|------------|------------------------|-----------------------------------------|-------------------------|-----------------|-----------------------------------------------------|--------------------------------|-------------------|---------------------|---------------------|
|            |            |                        |                                         |                         |                 | Polym <sup>+</sup>                                  | Bu <sub>4</sub> N <sup>+</sup> | PyMe <sup>+</sup> | EtPyMe <sup>+</sup> | BzPyMe <sup>+</sup> |
| 25         | 2.0        | 22                     | 1                                       | 96                      | Me              | 0.4                                                 | 0.6                            |                   |                     |                     |
| 25         | 4.0        | 22                     | 1                                       | 96                      | Me              | 0.9                                                 | 1.1                            |                   |                     |                     |
| 25         | 8.0        | 22                     | 1                                       | 96                      | Me              | 1.7                                                 | 1.9                            |                   |                     |                     |
| 10         | 16         | 22                     | 1                                       | 96                      | Me              | 1.1                                                 | 1.3                            | 2.5               | 2.8                 | 2.2                 |
| 15         | 16         | 22                     | 1                                       | 96                      | Me              | 1.7                                                 | 2.0                            | 3.1               | 3.5                 | 2.9                 |
| 20         | 16         | 22                     | 1                                       | 96                      | Me              | 2.5                                                 | 2.8                            | 4.7               | 5.5                 | 5.2                 |
| 25         | 16         | 22                     | 1                                       | 96                      | Me              | 4.0                                                 | 4.4                            | 7.1               | 9.2                 | 7.9                 |
| 30         | 16         | 22                     | 1                                       | 96                      | Me              | 5.3                                                 | 5.8                            | 11.0              | 11.6                | 9.6                 |
| 35         | 16         | 22                     | 1                                       | 96                      | Me              | 11.4                                                | 9.6                            | 17.0              | 19.1                | 16.4                |
| 40         | 16         |                        |                                         |                         |                 |                                                     | 12.9                           | 28.0              | 23.6                | 22.0                |
| 25         | 16         | 22                     | 1                                       | 59                      | Me              | 4.8                                                 |                                |                   |                     |                     |
| 25         | 16         | 22                     | 0.5                                     | 51                      | Me              | 4.4                                                 |                                |                   |                     |                     |
| 25         | 16         | 22                     | 1.3                                     | 51                      | Me              | 4.3                                                 |                                |                   |                     |                     |
| 25         | 16         | 22                     | 8.7                                     | 43                      | Me              | 3.6                                                 |                                |                   |                     |                     |
| 25         | 16         | 11                     | 2                                       | 96                      | Me              | 4.9                                                 |                                |                   |                     |                     |
| 25         | 16         | 11                     | 2                                       | 96                      | <sup>n</sup> Pr | 4.8                                                 |                                |                   |                     |                     |
| 25         | 16         | 11                     | 2                                       | 96                      | <sup>t</sup> Bu | 5.1                                                 |                                |                   |                     |                     |

**Table S2.** Observed pseudo first order rate constants,  $k_{\text{obs}}$ , for oxidative addition of MeI to  $[\text{Ir}(\text{CO})_2\text{I}_2]^-$  with polymeric and monomeric counterions in  $\text{CH}_2\text{Cl}_2$ .

| Temp<br>°C | [MeI]<br>M | Cross-<br>linking<br>% | 4-VP<br>content<br>mmol g <sup>-1</sup> | Film<br>thickness<br>μm | R               | 10 <sup>4</sup> $k_{\text{obs}}$<br>s <sup>-1</sup> |                                 |
|------------|------------|------------------------|-----------------------------------------|-------------------------|-----------------|-----------------------------------------------------|---------------------------------|
|            |            |                        |                                         |                         |                 | Polymer <sup>+</sup>                                | Ph <sub>4</sub> As <sup>+</sup> |
| 25         | 0.08       | 22                     | 1                                       | 96                      | Me              | 0.7                                                 | 2.4                             |
| 25         | 0.16       | 22                     | 1                                       | 96                      | Me              | 1.7                                                 | 5.0                             |
| 25         | 0.24       | 22                     | 1                                       | 96                      | Me              | 2.2                                                 | 7.5                             |
| 5          | 0.32       |                        |                                         |                         |                 |                                                     | 1.9                             |
| 15         | 0.32       | 22                     | 1                                       | 96                      | Me              | 0.5                                                 | 4.7                             |
| 20         | 0.32       | 22                     | 1                                       | 96                      | Me              | 1.2                                                 |                                 |
| 25         | 0.32       | 22                     | 1                                       | 96                      | Me              | 3.1                                                 | 10.3, 9.9                       |
| 30         | 0.32       | 22                     | 1                                       | 96                      | Me              | 3.8                                                 |                                 |
| 35         | 0.32       | 22                     | 1                                       | 96                      | Me              | 3.8                                                 | 20.5                            |
| 25         | 0.32       | 22                     | 1                                       | 96                      | <sup>n</sup> Pr | 2.9                                                 |                                 |

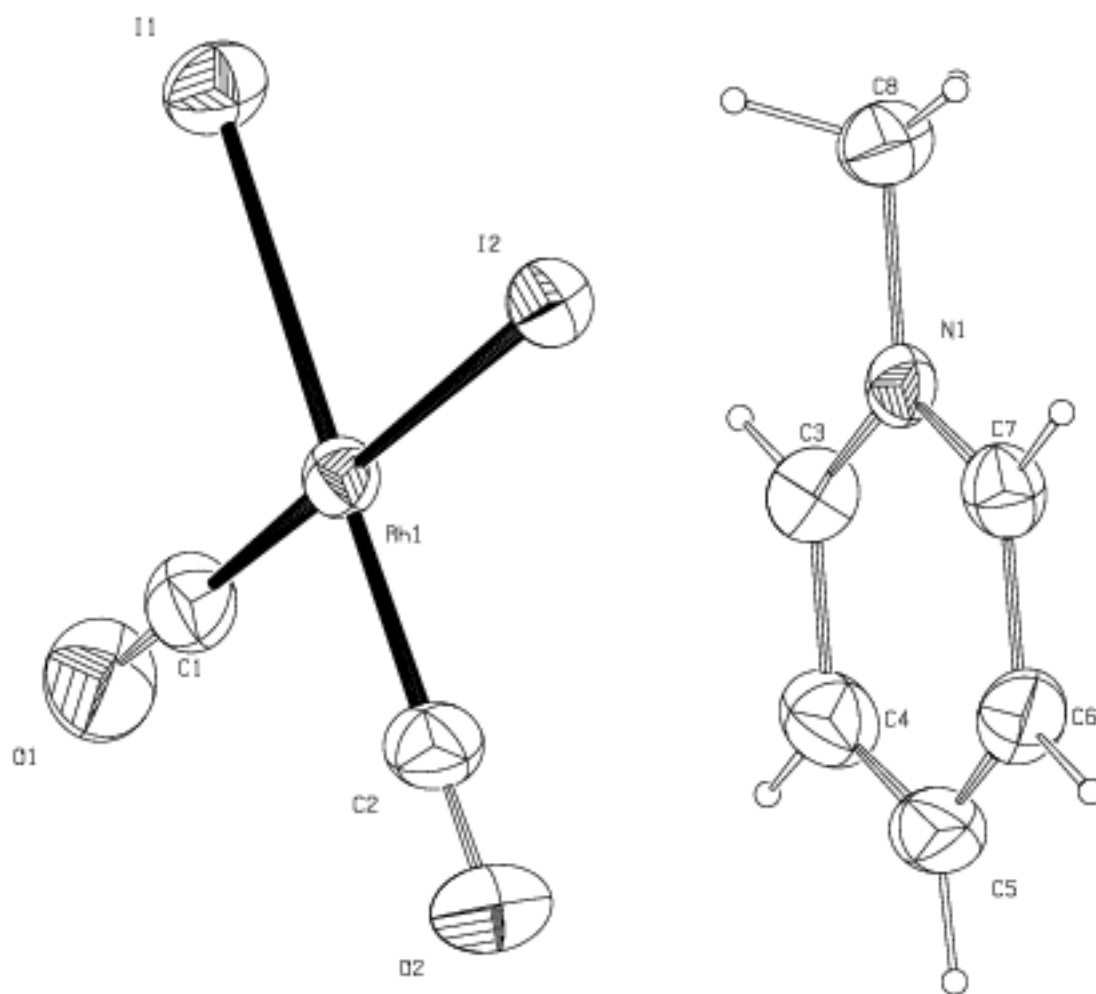

**Figure S1.** ORTEP plot for  $[C_5H_5NMe][Rh(CO)_2I_2]$  **1**. Thermal ellipsoids are shown at the 50% probability level.

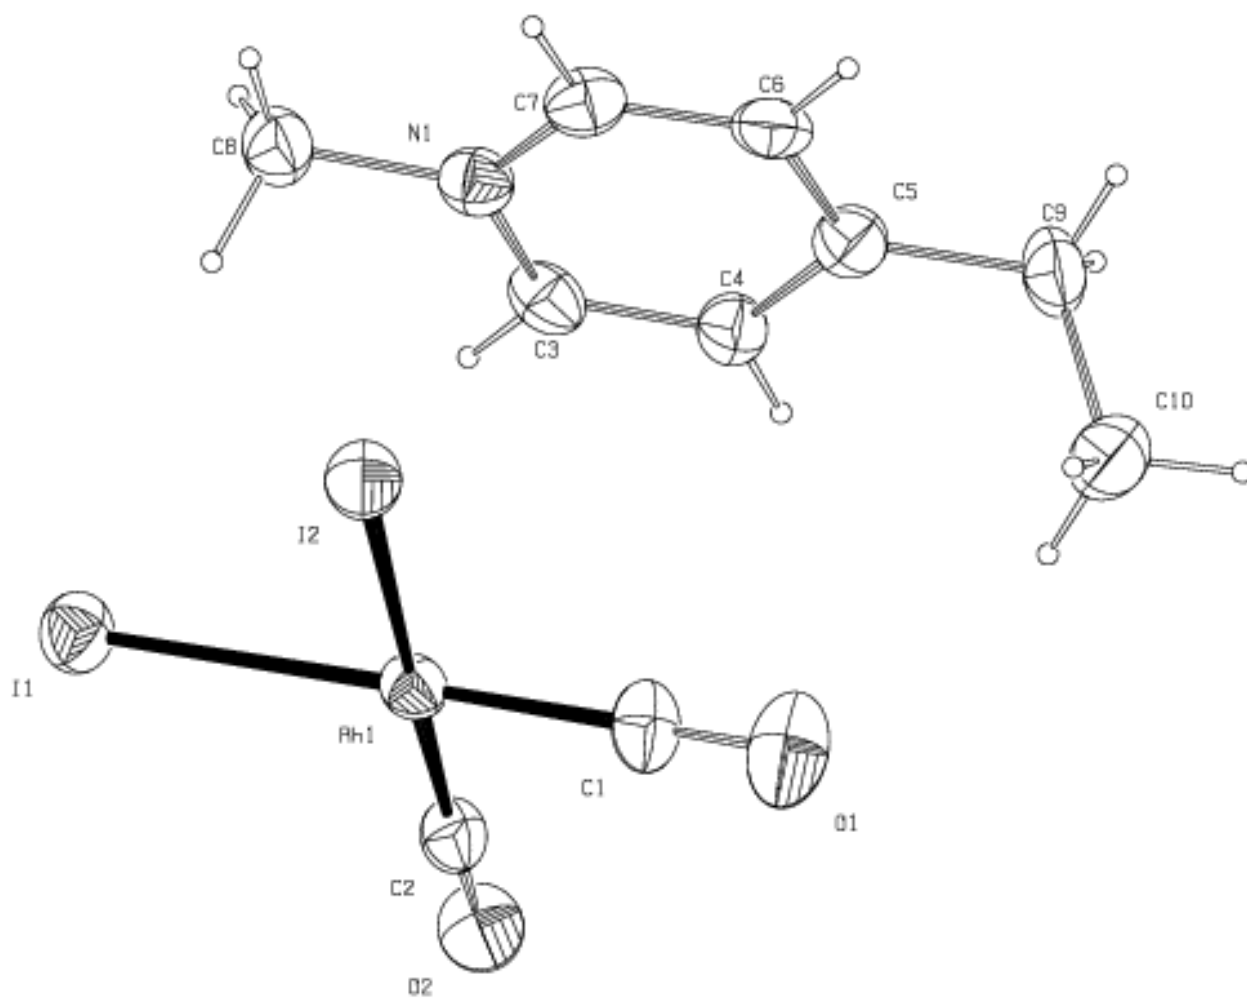

**Figure S2.** ORTEP plot for [4-Et-C<sub>5</sub>H<sub>4</sub>NMe][Rh(CO)<sub>2</sub>I<sub>2</sub>] **2**. Thermal ellipsoids are shown at the 50% probability level.
